# Supplementary material
Source: PubMed Central journal article supplement (PMC8191209)
Supplement: 13195_2021_850_MOESM1_ESM.pdf [file 13195_2021_850_MOESM1_ESM.pdf]

## **SUPPORTING INFORMATION**

**Network medicine links SARS-CoV-2/COVID-19 infection to brain microvascular injury and neuroinflammation in dementia-like cognitive impairment**

Zhou Y et al., 2021

\*Correspondence to: Feixiong Cheng, PhD

Lerner Research Institute, Cleveland Clinic

Tel: 216-444-7654; Fax: 216-636-0009

Email: [chengf@ccf.org](mailto:chengf@ccf.org)

## Table of Contents

### Supplementary Results

#### Supplementary Figures

**Fig. S1.** Functional enrichment analysis and largest connected component of the six CRISPR-Cas9-based SARS-CoV-2 host factor datasets.

**Fig. S2.** Network proximity results using different numbers of top genes from the CRISPR-Cas9-based SARS-CoV-2 host factor datasets.

**Fig. S3.** Single-cell level expression of AD blood markers in the PBMC samples of COVID-19 patients.

**Fig. S4.** Expression spectrum of the SARS-CoV-2 entry factors in the entorhinal cortex from Alzheimer's disease patients and controls.

**Fig. S5.** Expression spectrum of the SARS-CoV-2 entry factors in individuals with different *APOE* genotypes.

**Fig. S6.** Expression of the key SARS-CoV-2 entry factors in different tissues.

**Fig. S7.** Expression of the key SARS-CoV-2 entry factors in different brain regions.

**Fig. S8.** Cumulative degree distribution of 964 innate immune genes, 14267 brain expressed genes, and 3383 brain specific genes.

#### Supplementary Tables

**Table S1.** SARS-CoV-2 host factor datasets. (.xlsx)

**Table S2.** Neurological diseases-associated genes/proteins. (.xlsx)

**Table S3.** Alzheimer's disease markers and their expressions. (.xlsx)

**Table S4.** Transcriptomic datasets used in this study.

**Table S5.** Raw data and network analysis results of the nodes in Fig. 2b. (.xlsx)

**Table S6.** Differentially expressed genes in brain endothelial cells vs. other cell types. (.xlsx)

**Table S7.** Differentially expressed genes in brain endothelial cells by comparing *APOE* genotype E3/E3 and E4/E4 in Alzheimer's disease patients. (.xlsx)

**Table S8.** Differentially expressed genes in Alzheimer's disease patients vs. normal controls for each cell type. (.xlsx)

## Supplementary Results

We compiled ten SARS-CoV-2 and other HCoV host factor profiles, including six datasets from CRISPR-Cas9 assays (CRISPR\_A549-H, CRISPR\_A549-L, CRISPR\_HuH7-229E, CRISPR\_HuH7-OC43, CRISPR\_HuH7-SARS2, and CRISPR\_VeroE6), and four datasets for virus-human PPIs (SARS2-PPI, SARS1-PPI, MERS-PPI, and HCoV-PPI) (see Methods). The six CRISPR-Cas9-based datasets adopted genome-scale CRISPR loss-of-function screening methods in the SARS-CoV-2 infected cell lines (as indicated in the dataset name) to identify host factors required for the infection.

As we hypothesized that the SARS-CoV-2 host factors form a subnetwork within the comprehensive human protein interactome, we first computed the largest connected components (LCC) of the CRISPR-Cas9-based datasets. LCC quantifies the number of genes/proteins in the largest subnetwork formed by a dataset. We found that three of these datasets, including CRISPR\_A549-H, CRISPR\_A549-L, and CRISPR\_HuH7-229E, consistently show significantly large LCC (**Table S1**), when we used top-50, -100, and -150 genes. Top-100 revealed the highest number of significant LCCs for the SARS-CoV-2 datasets (CRISPR\_A549-H  $p = 0.007$ , CRISPR\_A549-L  $p < 0.001$ , CRISPR\_VeroE6  $p = 0.037$ , permutation test, **Table S1, Fig. S1**). Therefore, we selected top-100 genes from these datasets for downstream analyses. These results suggest that these datasets form disease modules in the human protein interactome and offer opportunities for network-based discoveries.

Next, we performed functional enrichment analyses for these datasets (**Fig. S1**). We identified several common pathways and GO terms that are enriched in more than

three datasets, including autophagy, lysosome, vesicle-mediated transport, endosomal transport, intracellular pH reduction, macromolecule catabolic process, regulation of lysosomal lumen pH, cytosolic transport, and selective autophagy. These datasets also have different functional enrichment. For example, CRISPR\_VeroE6 is enriched in functions related to cell cycle, cell growth, and chromatin remodeling, and CRISPR\_HuH7-SARS2 is enriched in heparan sulfate biosynthetic functions. These results suggest that the SARS-CoV-2 host factors participate in various essential cellular functions. In addition, these datasets contain complementary information of the cellular states of the SARS-CoV-2 infection and host response.

**Table S4.** Transcriptomic datasets used in this study.

| GEO ID    | Type                  | Organism     | Sample / Brain region                        | Groups                                                                                                                                                                                                   | Cell types                                                                                                                                                                                                                                                                                                                                                                 |
|-----------|-----------------------|--------------|----------------------------------------------|----------------------------------------------------------------------------------------------------------------------------------------------------------------------------------------------------------|----------------------------------------------------------------------------------------------------------------------------------------------------------------------------------------------------------------------------------------------------------------------------------------------------------------------------------------------------------------------------|
| GSE147528 | single-nuclei RNA-seq | Homo sapiens | superior frontal gyrus and entorhinal cortex | 10 males with varying stages of Alzheimer's disease (AD)                                                                                                                                                 | astrocytes, excitatory neurons, inhibitory neurons, and microglia                                                                                                                                                                                                                                                                                                          |
| GSE157827 | single-nuclei RNA-seq | Homo sapiens | prefrontal cortex                            | 12 AD patients and 9 normal controls                                                                                                                                                                     | astrocytes, endothelial cells, excitatory neurons, inhibitory neurons, microglia, and oligodendrocytes                                                                                                                                                                                                                                                                     |
| GSE138852 | single-nuclei RNA-seq | Homo sapiens | entorhinal cortex                            | AD (n = 6) and healthy controls (n = 6)                                                                                                                                                                  | astrocytes, endothelial cells, neurons, microglia, oligodendrocytes, and oligodendrocyte progenitor cells                                                                                                                                                                                                                                                                  |
| GSE157103 | bulk RNA-seq          | Homo sapiens | peripheral blood mononuclear cell (PBMC)     | 66 intensive care unit (ICU) patients (COVID-19 patients n = 50 vs. non-COVID-19 patients n = 16), 59 non-ICU patients (COVID-19 patients n = 49 vs. non-COVID-19 patients n = 10), and all 125 patients | N/A                                                                                                                                                                                                                                                                                                                                                                        |
| GSE149689 | single-cell RNA-seq   | Homo sapiens | PBMC                                         | 6 samples from severe COVID-19 patients, 4 samples from mild COVID-19 patients, and 4 samples from healthy controls                                                                                      | IgG <sup>-</sup> B cells, IgG <sup>+</sup> B cells, CD4 <sup>+</sup> T cell effector memory (EM)-like cells, CD4 <sup>+</sup> T cell non-EM-like cells, CD8 <sup>+</sup> T cell EM-like cells, CD8 <sup>+</sup> T cell non-EM-like cells, dendritic cells, monocytes, intermediate monocytes, nonclassical monocytes, natural killer cells, platelets, and red blood cells |
| GSE163005 | single-cell RNA-seq   | Homo sapiens | Cerebrospinal fluid                          | 8 COVID-19 patients, 9 multiple sclerosis patients, 9 idiopathic intracranial hypertension patients, and 5 viral encephalitis patients                                                                   | T cells, dendritic cells, and monocytes                                                                                                                                                                                                                                                                                                                                    |

Fig. S1

CRISPR\_A549-H

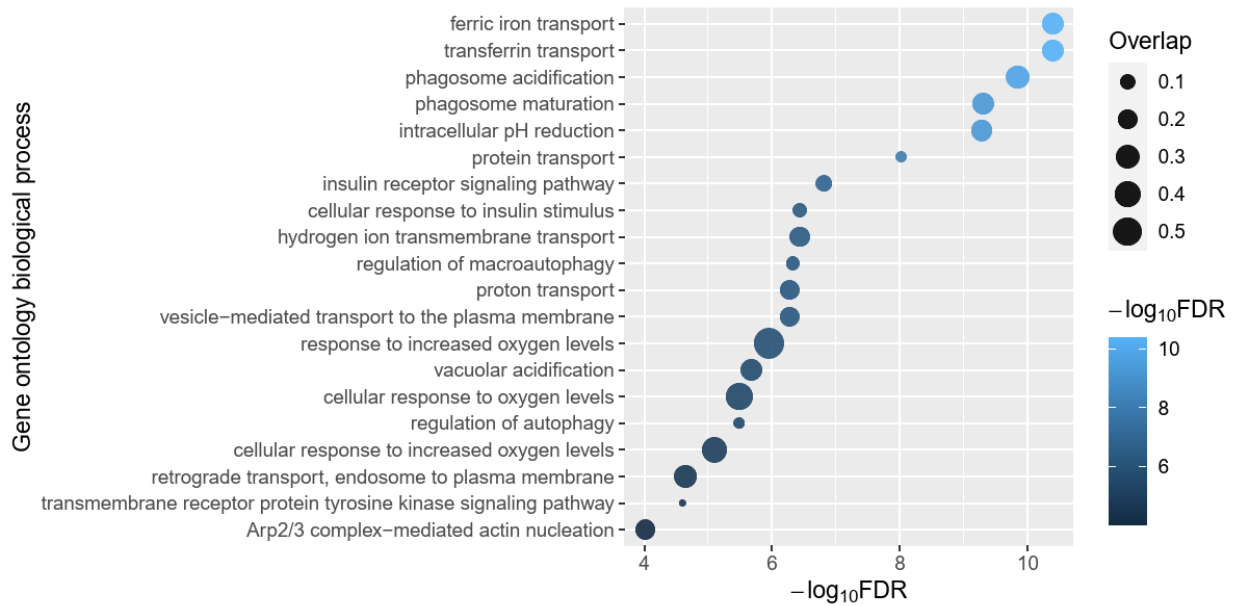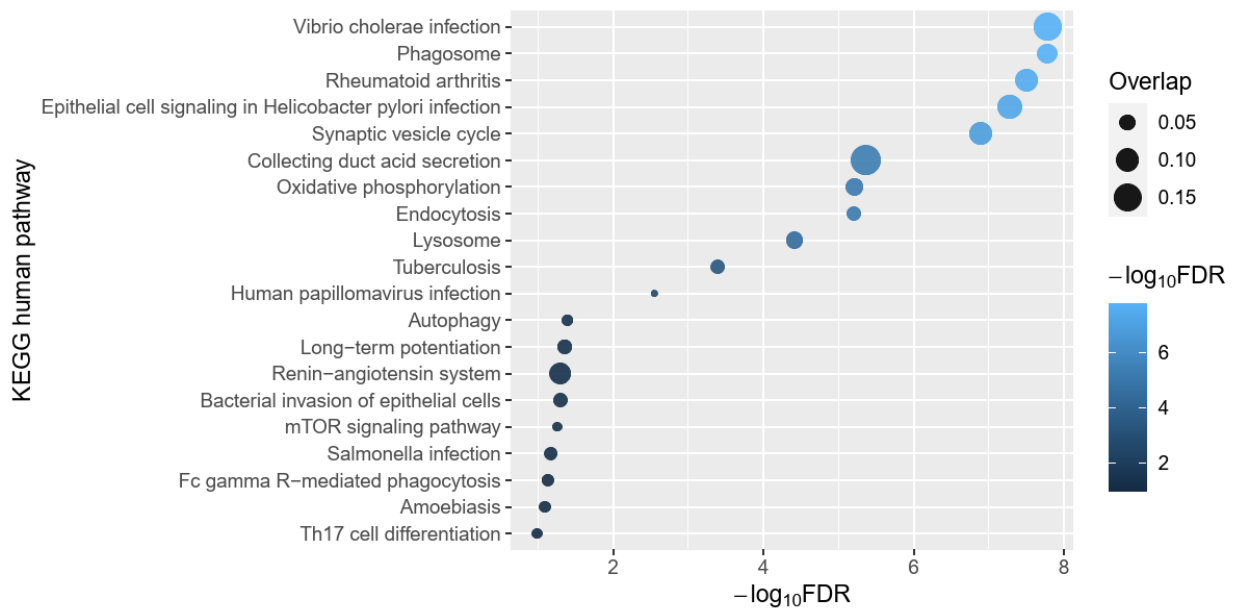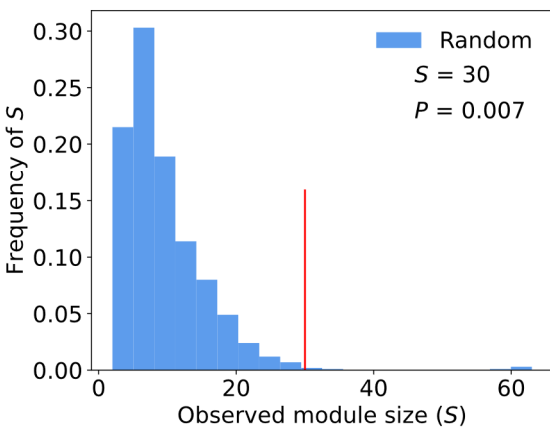

**Fig. S1.** Functional enrichment analysis and largest connected component of the six CRISPR-Cas9-based SARS-CoV-2 host factor datasets. Top 100 genes from each dataset were used for the analyses.

**Fig. S1 continued**

**CRISPR\_A549-L**

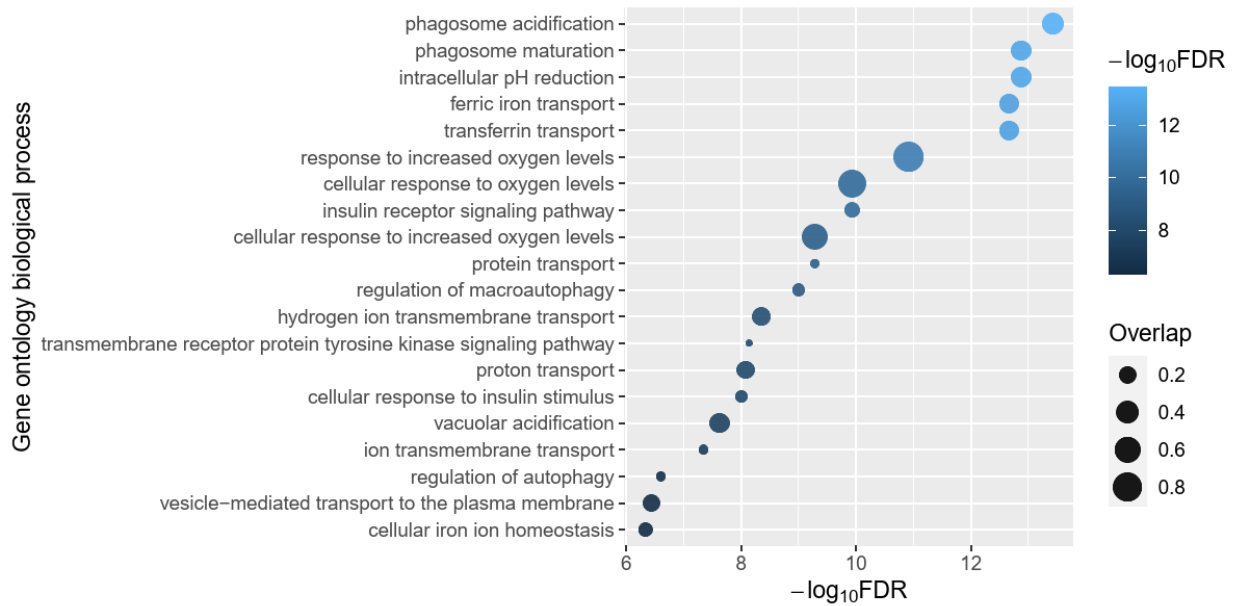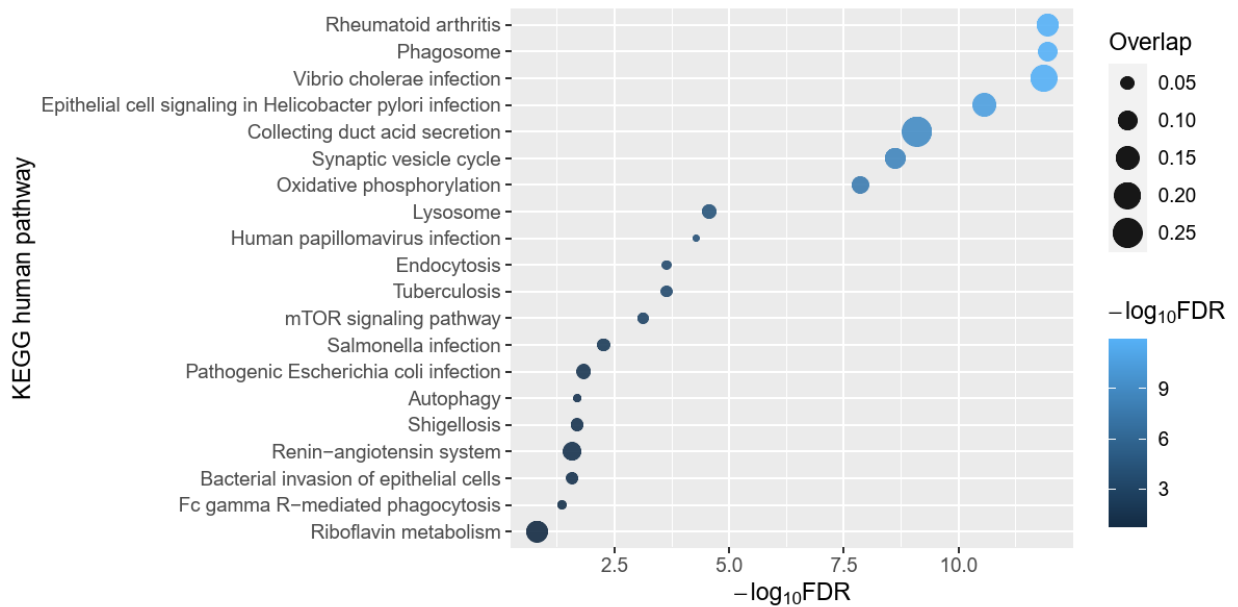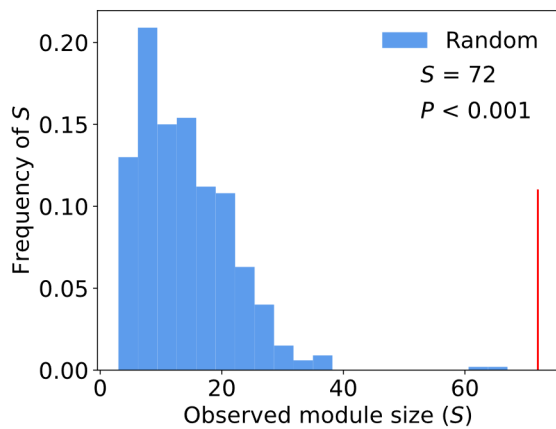

Fig. S1 continued

CRISPR\_HuH7-229E

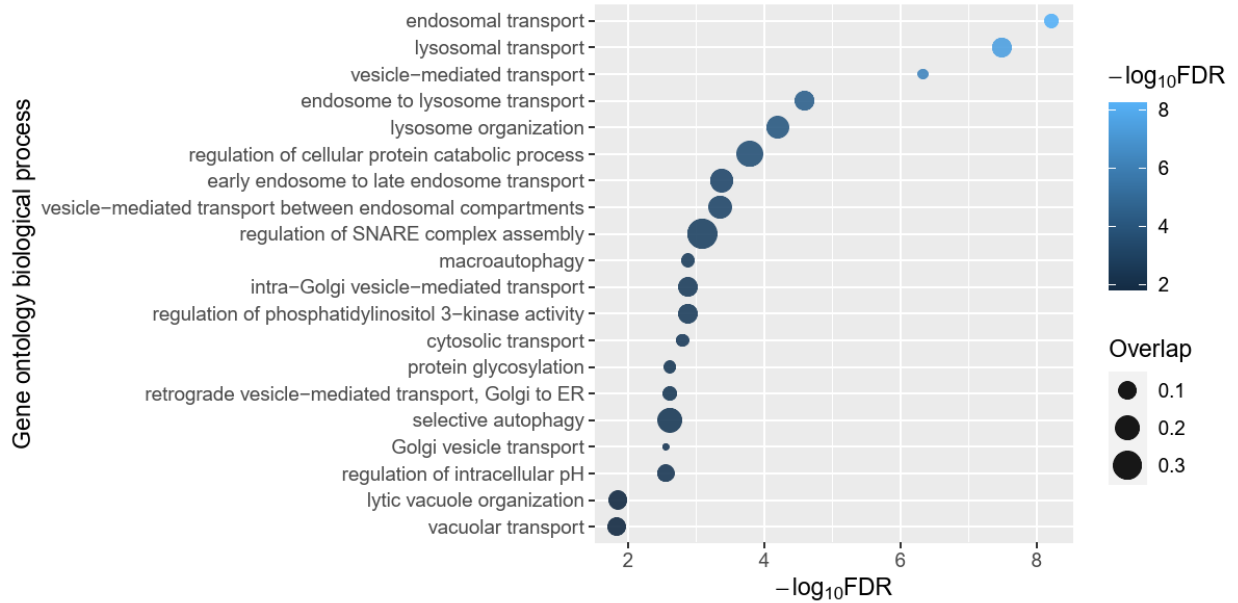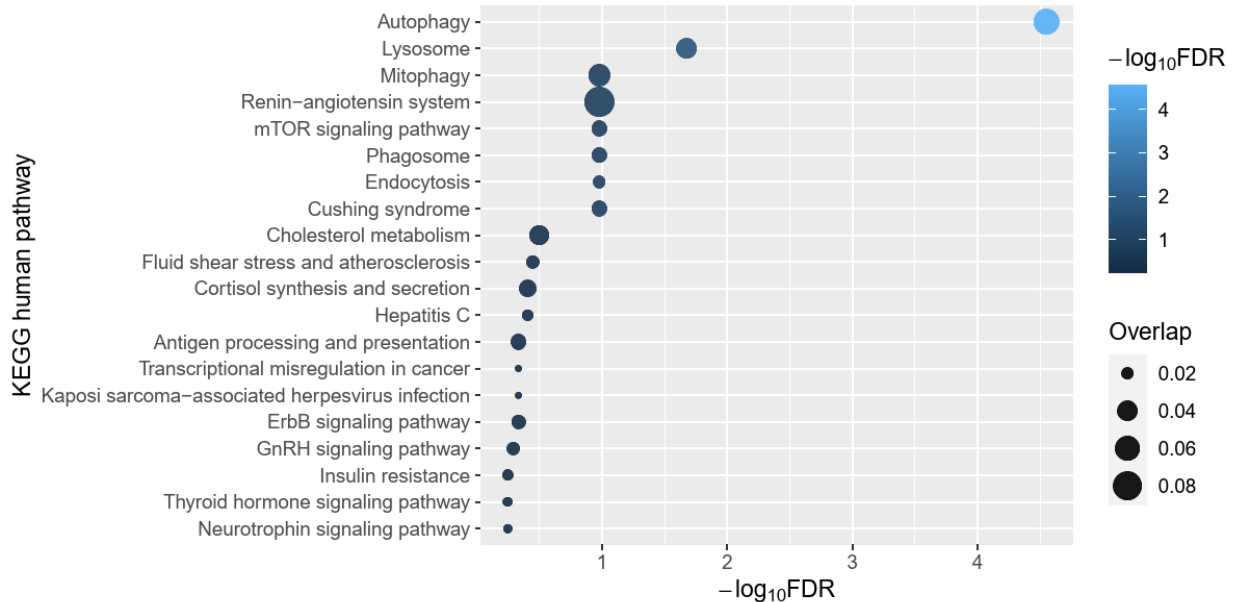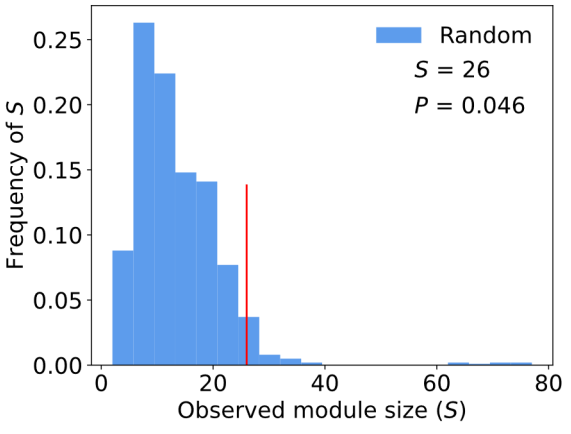



**Fig. S1 continued**

**CRISPR\_HuH7-OC43**

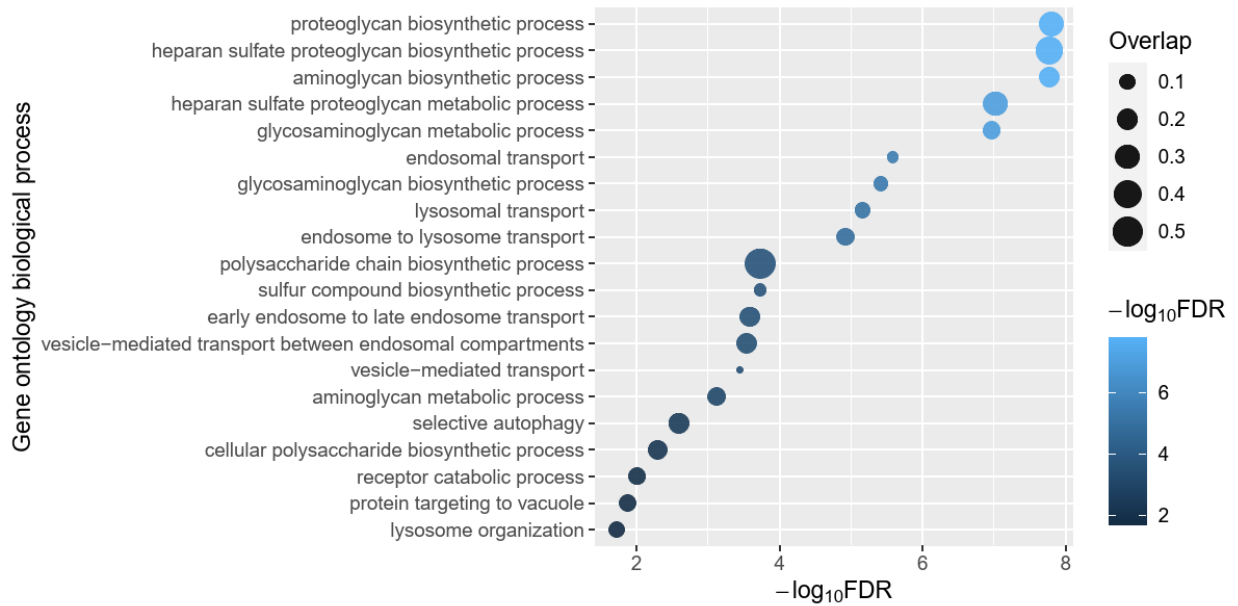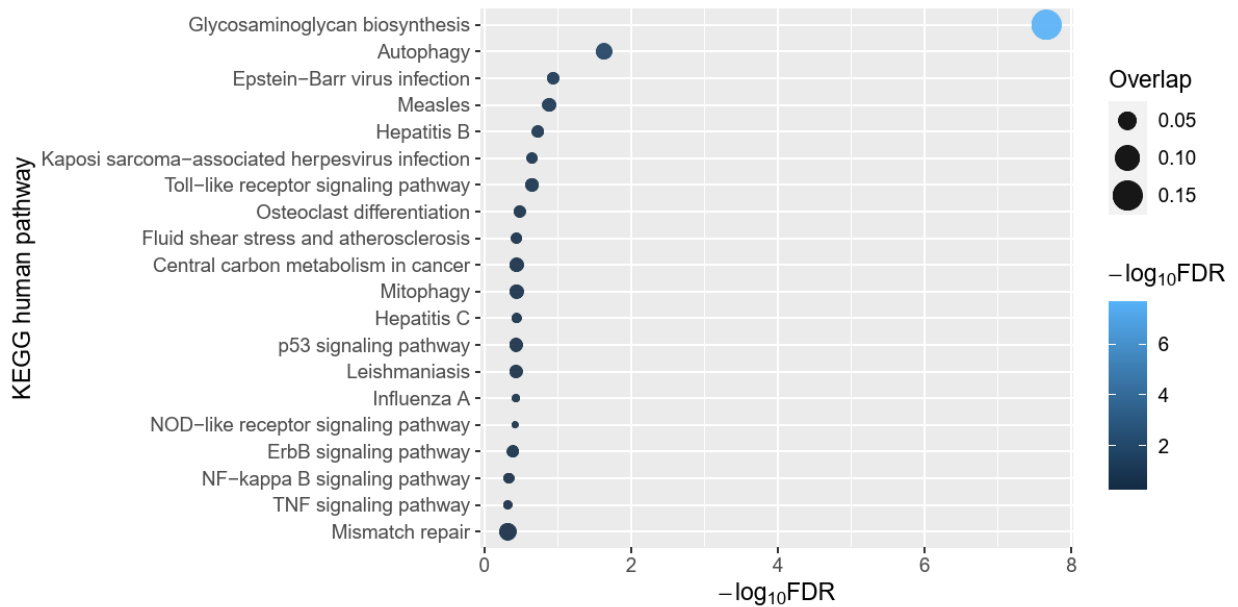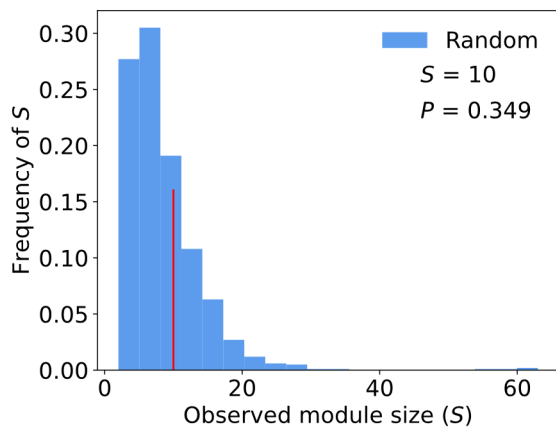

**Fig. S1 continued**

**CRISPR\_HuH7-SARS2**

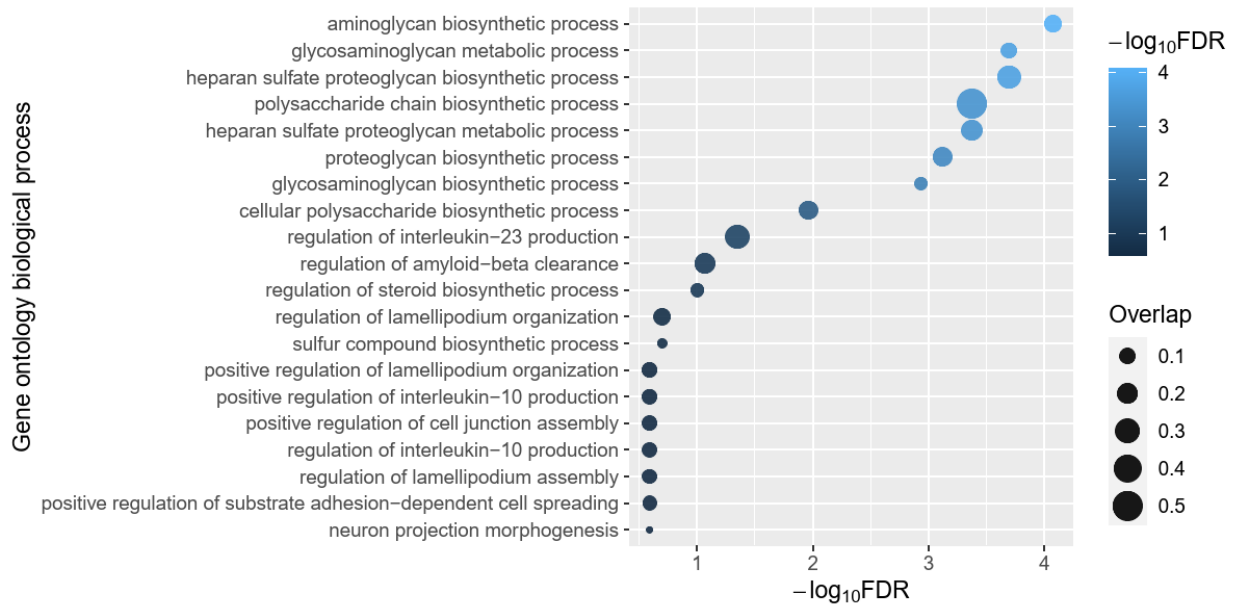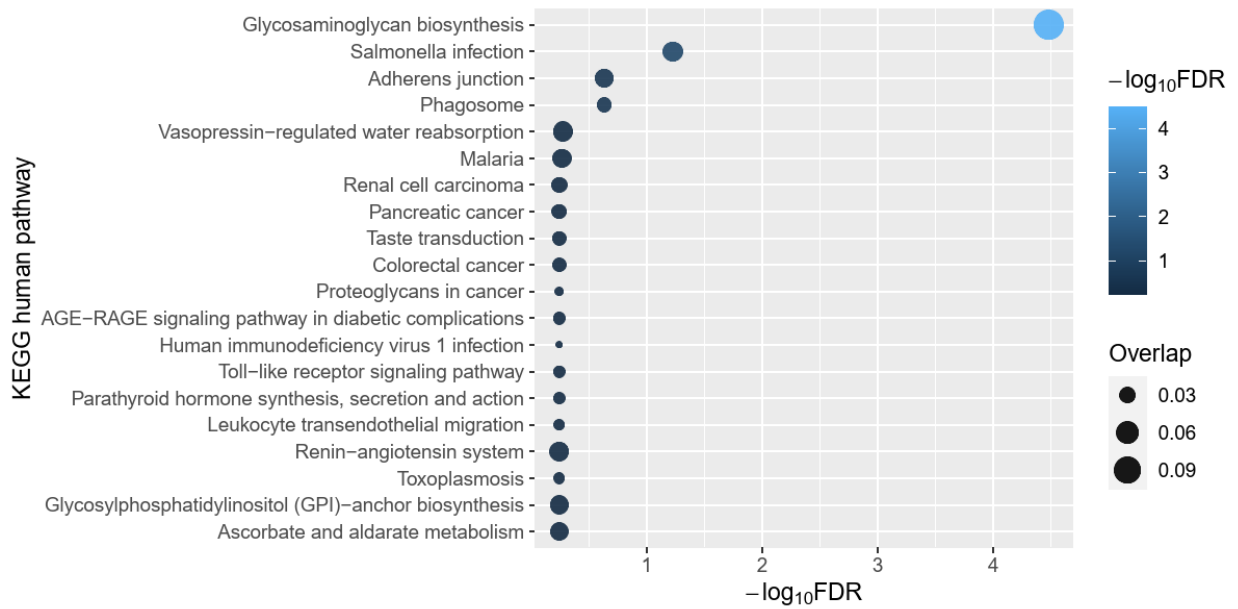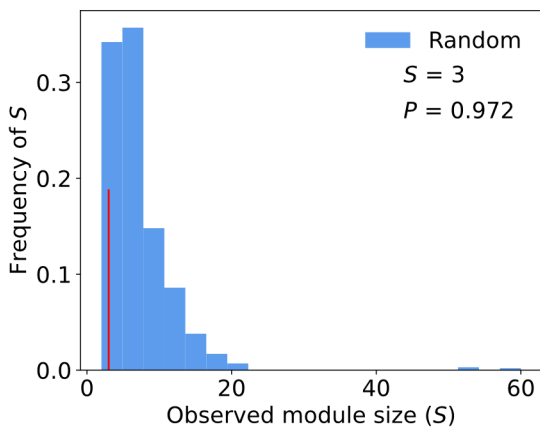

Fig. S1 continued

CRISPR\_VeroE6

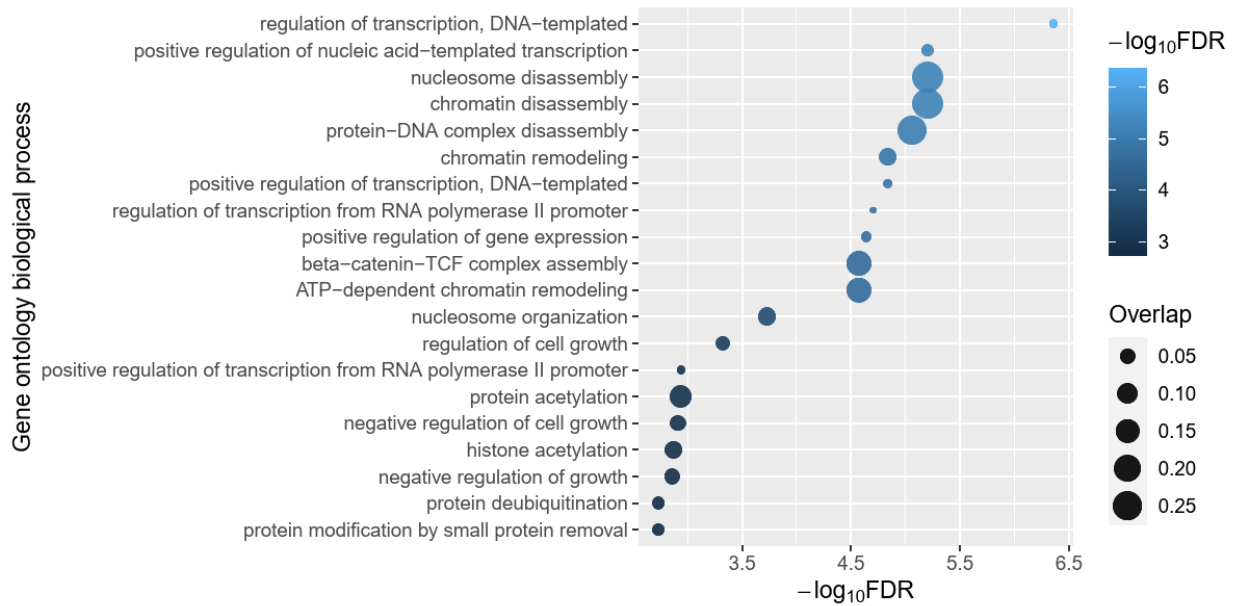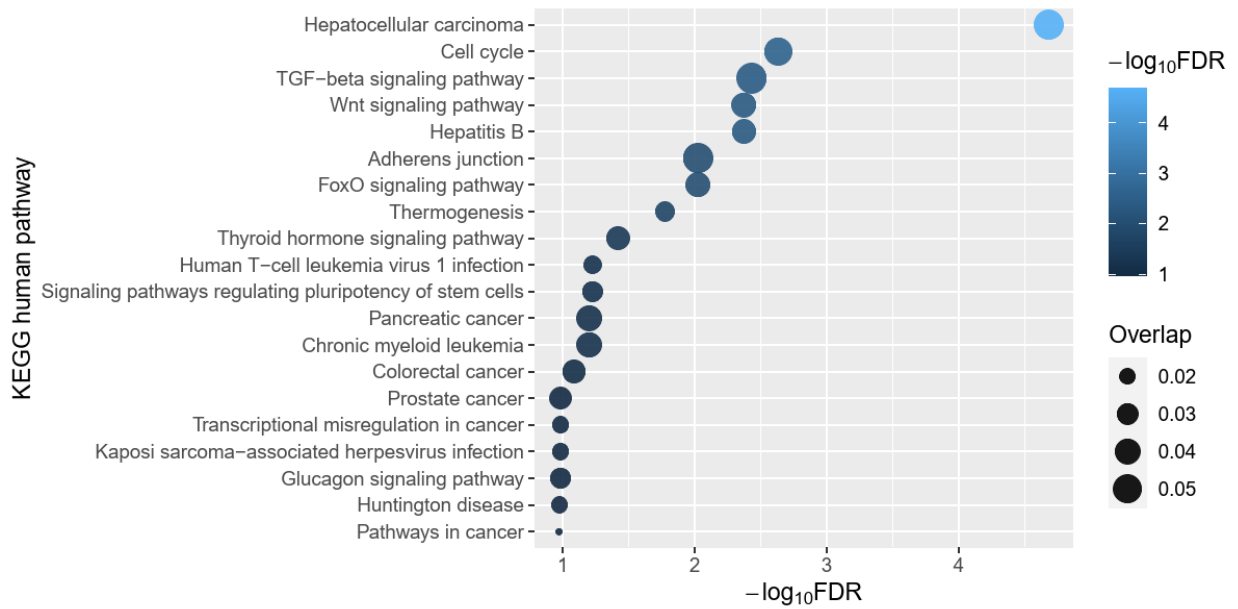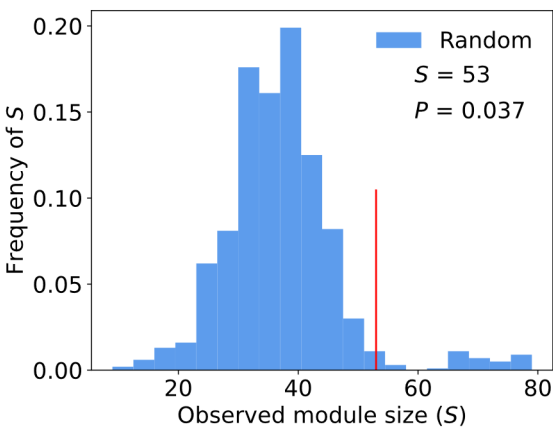

**Fig. S2**

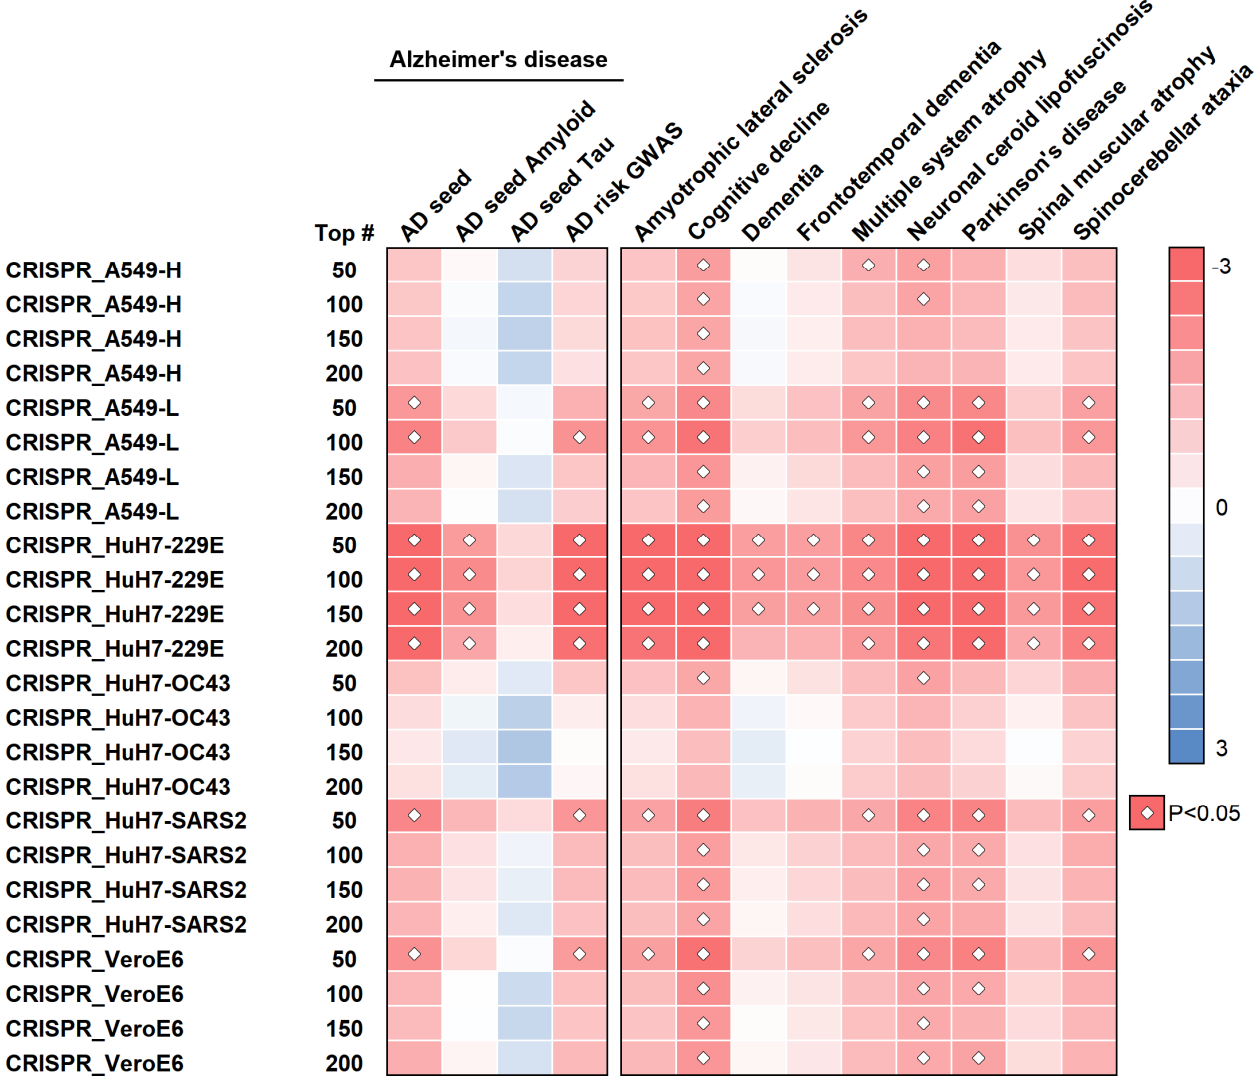

**Fig. S2.** Network proximity results using different numbers of top genes from the CRISPR-Cas9-based SARS-CoV-2 host factor datasets. Heatmap shows the proximities of the CRISPR-Cas9-based SARS-CoV-2 host factor datasets and 10 neurological diseases using different numbers of top genes (i.e., top-50, -100, -150, and -200) from the CRISPR-Cas9 assay.

Fig. S3

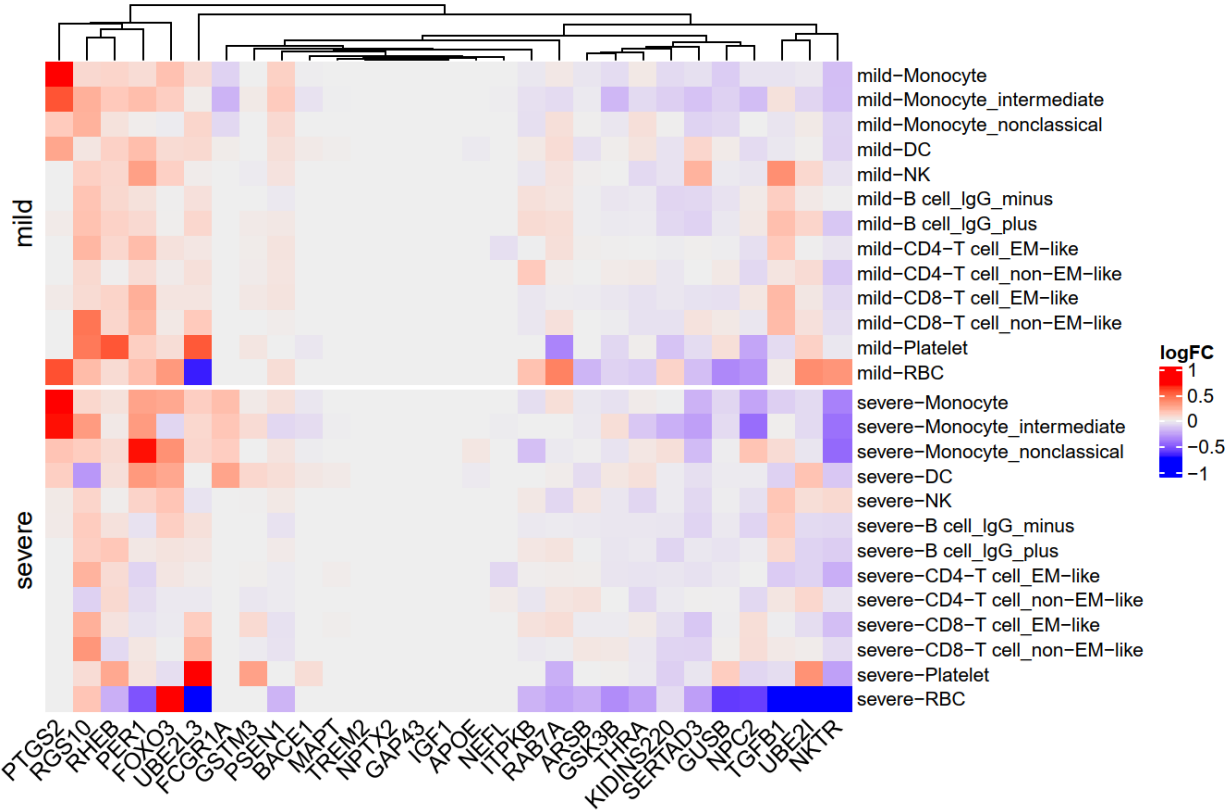

Fig. S3. Single-cell level expression of AD blood markers in the PBMC samples of COVID-19 patients. Heatmap shows the expression change in mild / severe COVID-19 patients versus healthy controls. Data source: GSE149689.

**Fig. S4**

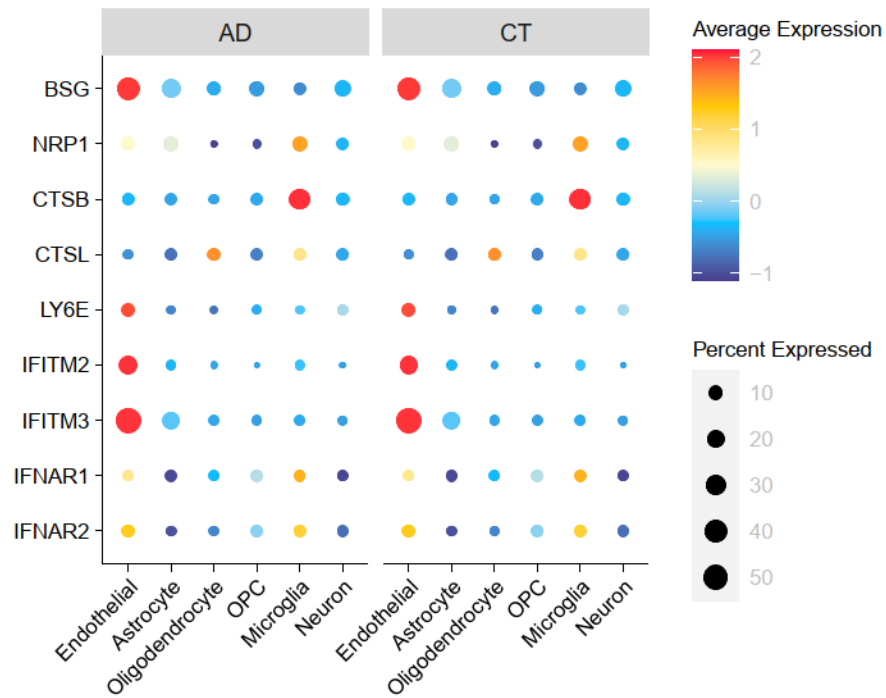

**Fig. S4.** Expression spectrum of the SARS-CoV-2 entry factors in the entorhinal cortex from Alzheimer's disease patients and controls. AD, Alzheimer's disease patients. CT, controls. OPC, oligodendrocyte progenitor cell. Data source: GSE138852.

**Fig. S5**

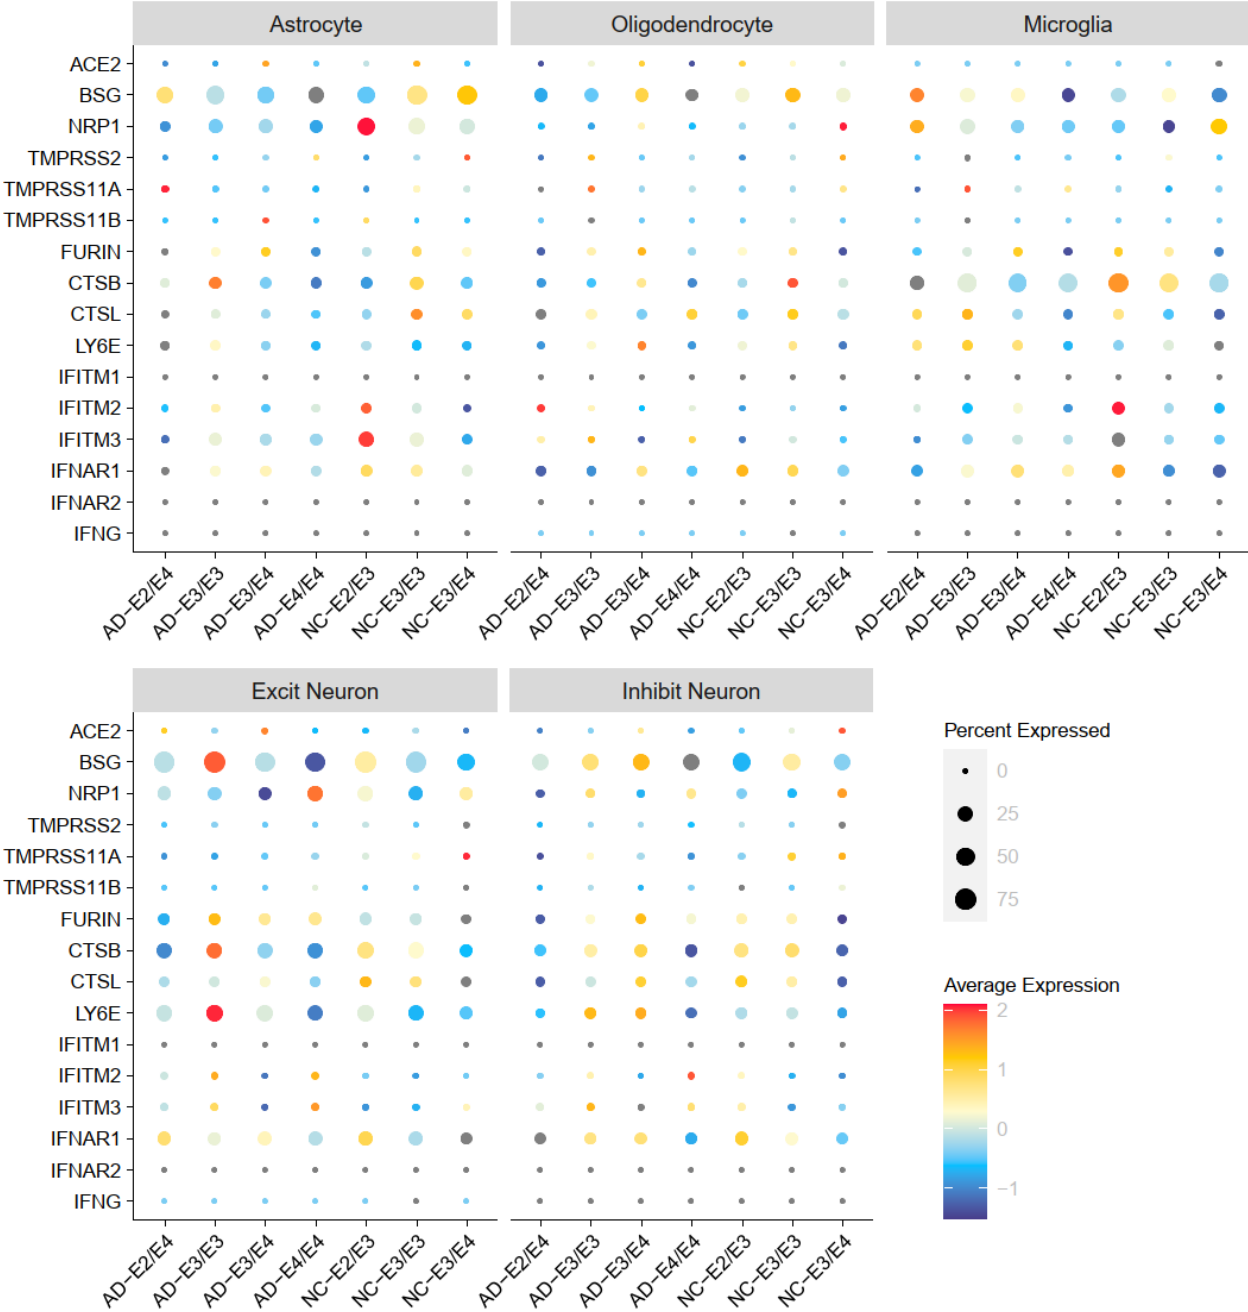

**Fig. S5.** Expression spectrum of the SARS-CoV-2 entry factors in individuals with different *APOE* genotypes. AD, Alzheimer’s disease patients. NC, normal controls. Data source: GSE157827.

**Fig. S6**

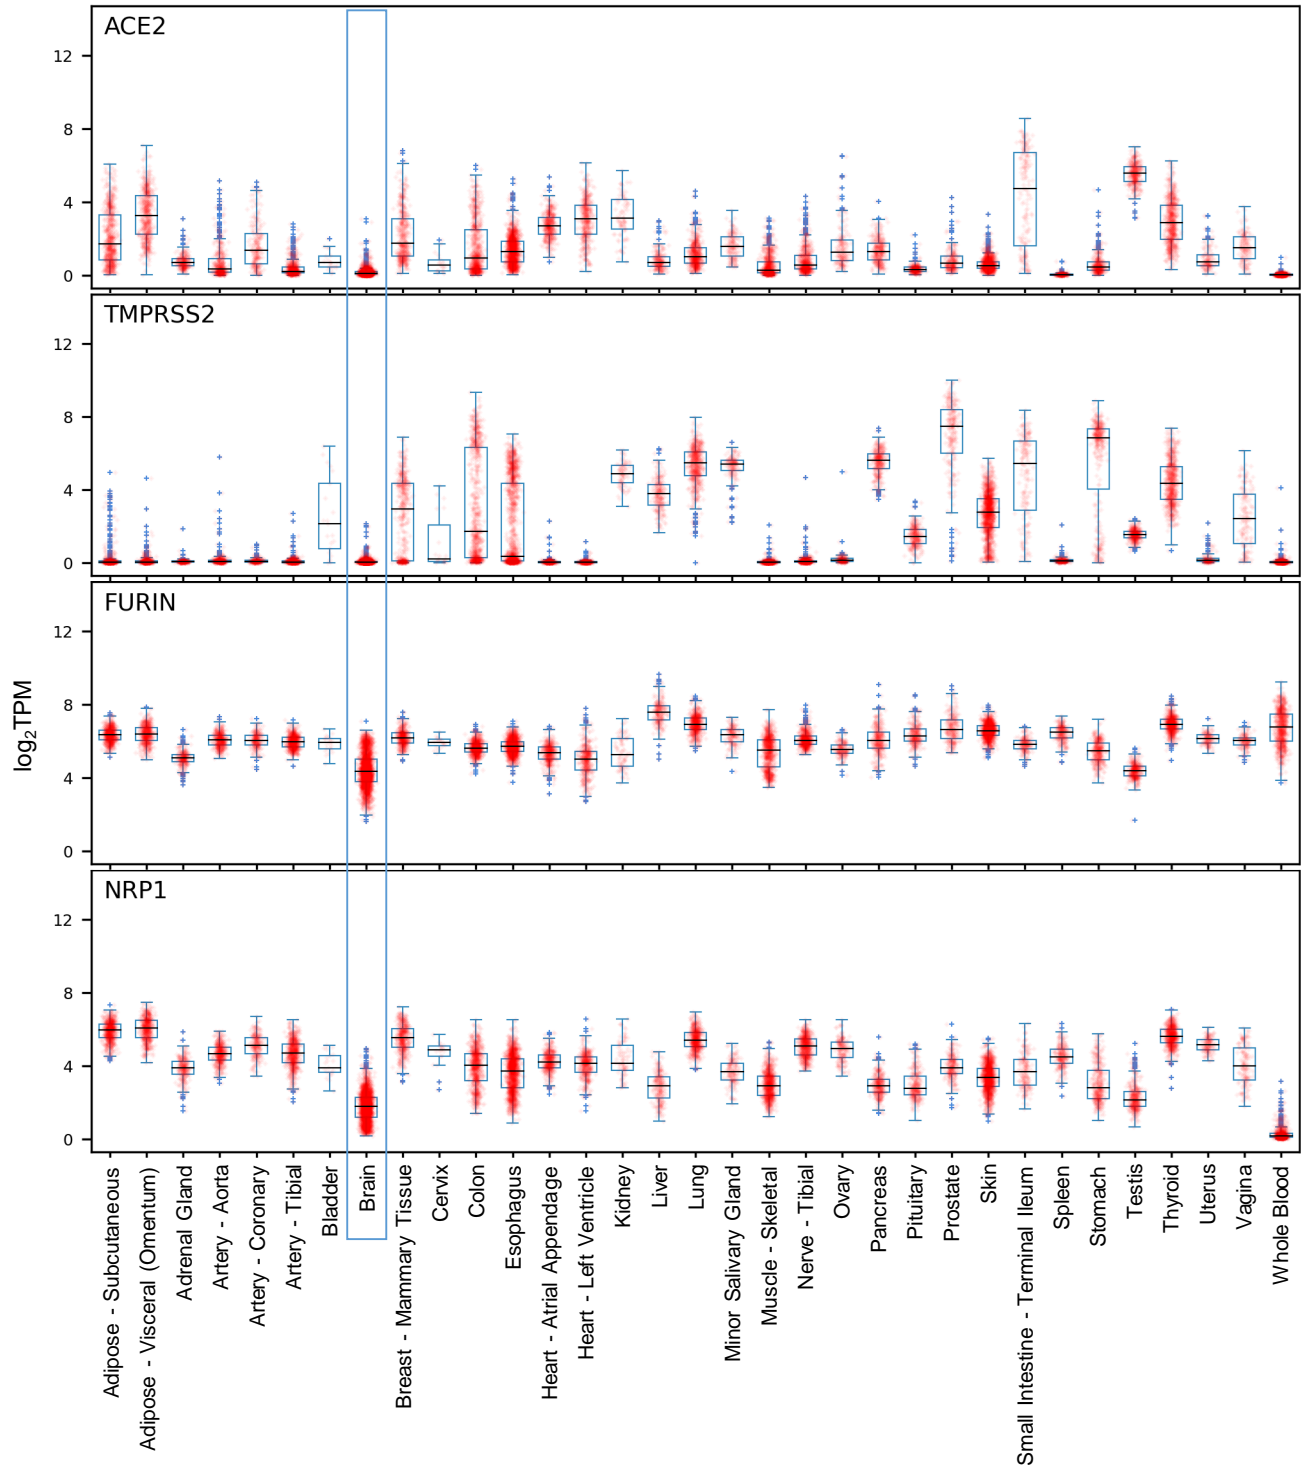

**Fig. S6.** Expression of the key SARS-CoV-2 entry factors in different tissues. Data source: GTEx v8.



**Fig. S7**

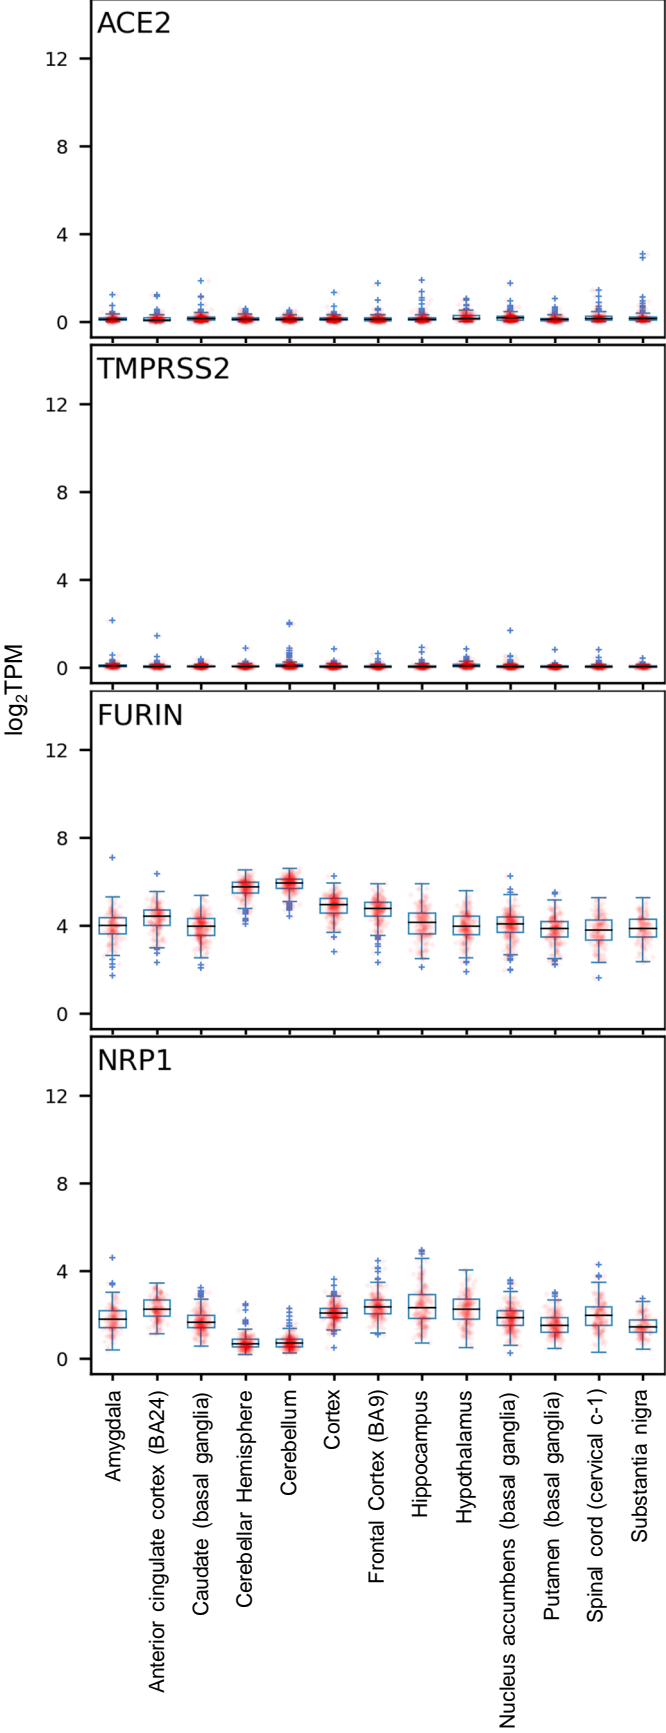

**Fig. S7.** Expression of the key SARS-CoV-2 entry factors in different brain regions. Data source: GTEx v8.

**Fig. S8**

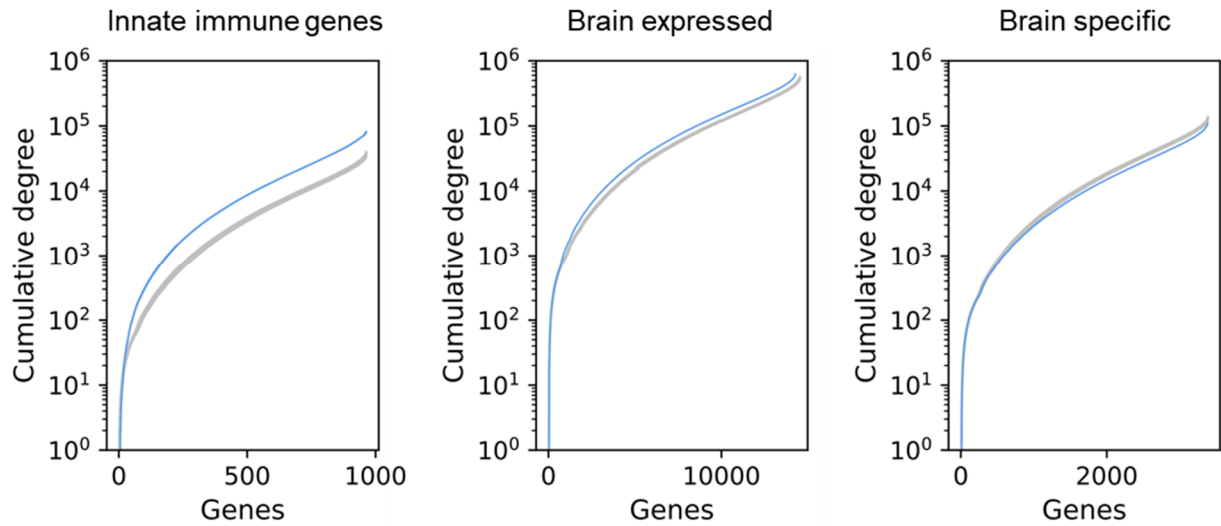

**Fig. S8.** Cumulative degree distribution of 964 innate immune genes, 14267 brain expressed genes, and 3383 brain specific genes. Blue - degree of these gene sets; grey – background generated using permutation test of 100 repeats with the entire interactome. Genes that were in the interactome were used for sampling. Innate immune genes were extracted from InnateDB. Brain expressed and brain specific genes were generated based on the GTEx data using the method described in the manuscript (genes with count per million  $\geq 0.5$  in over 90% samples were considered expressed; genes with positive normalized average expression were considered specific).
